# Supplementary material for: Foreign genes and novel hydrophilic protein genes participate in the desiccation response of the bdelloid rotifer Adineta ricciae
Source: Oxford University Press journal article supplement (doi:10.1242/jeb.050328), 2010-12-08
Supplement: jeb050328figs1-a-b.pdf [file jeb050328figs1-a-b.pdf]

# B

```
F24-59      TTGIVLDSGDGVTHDVPIYEGYALPHAILRLDLAGRDLTDYLMKILTERGYSFVTTAERE 60
F24-62      -----VPIYEGYALPHAILHLDLAGRDLTDYLMKILTERGYSFVTTAERE 45
F24-68      -----GRDLTDYLMKILTERGYSFVTTAERE 26
F24-78      TTGIVLDSGDGVTHDVPIYEGYALPHAILRLDLAGRDLTDYLMKILTERGYSFVTTAERE 60
                *****

F24-59      IVRDIKEKLCYVALDFEQEMATAASTSSLEKSYELPDGQVITIGNERFRCPESLFQPSFL 120
F24-62      IVRDIKEKLCYVALDFEQEMATAASTSSLEKSYELPDGQVIAIGNERFRCPESLFQPSFL 105
F24-68      IVRDIKEKLCYVALDFEQEMATAASTSSLEKSYELPDGQVITIGNERFRCPESLFQPSFL 86
F24-78      IVRDIKEKLCYVALDFEQEMATAASTSSLEKSYELPDGQVITIGNERFRCPESLFQPSFL 120
                *****;*****

F24-59      GMEVAGIHETTFNSIMKCDIDIRKDSYANTVLSGG----- 155
F24-62      GMEVAGIHETTFNSIMKCDIDIRKDLYANTVLSGGTSMYPGIADRMQKEITALAPSTMKI 165
F24-68      GMEVAGIHETTFNSIMKCDIDIRKDLYANTVLSGG----- 121
F24-78      GMEVAGIHETTFNSIMKCDIDIRKDLYANTVLSGG----- 155
                *****

F24-59      -----
F24-62      KIIAPPERKYSVWIGGSILASLSTFQQMWISKQYDEAGPSIVHRKCF 213
F24-68      -----
F24-78      -----
```
