# Supplementary figures and images for: Foreign genes and novel hydrophilic protein genes participate in the desiccation response of the bdelloid rotifer Adineta ricciae
Source: Oxford University Press journal article supplement (doi:10.1242/jeb.050328), 2010-12-08

Fig. S2A

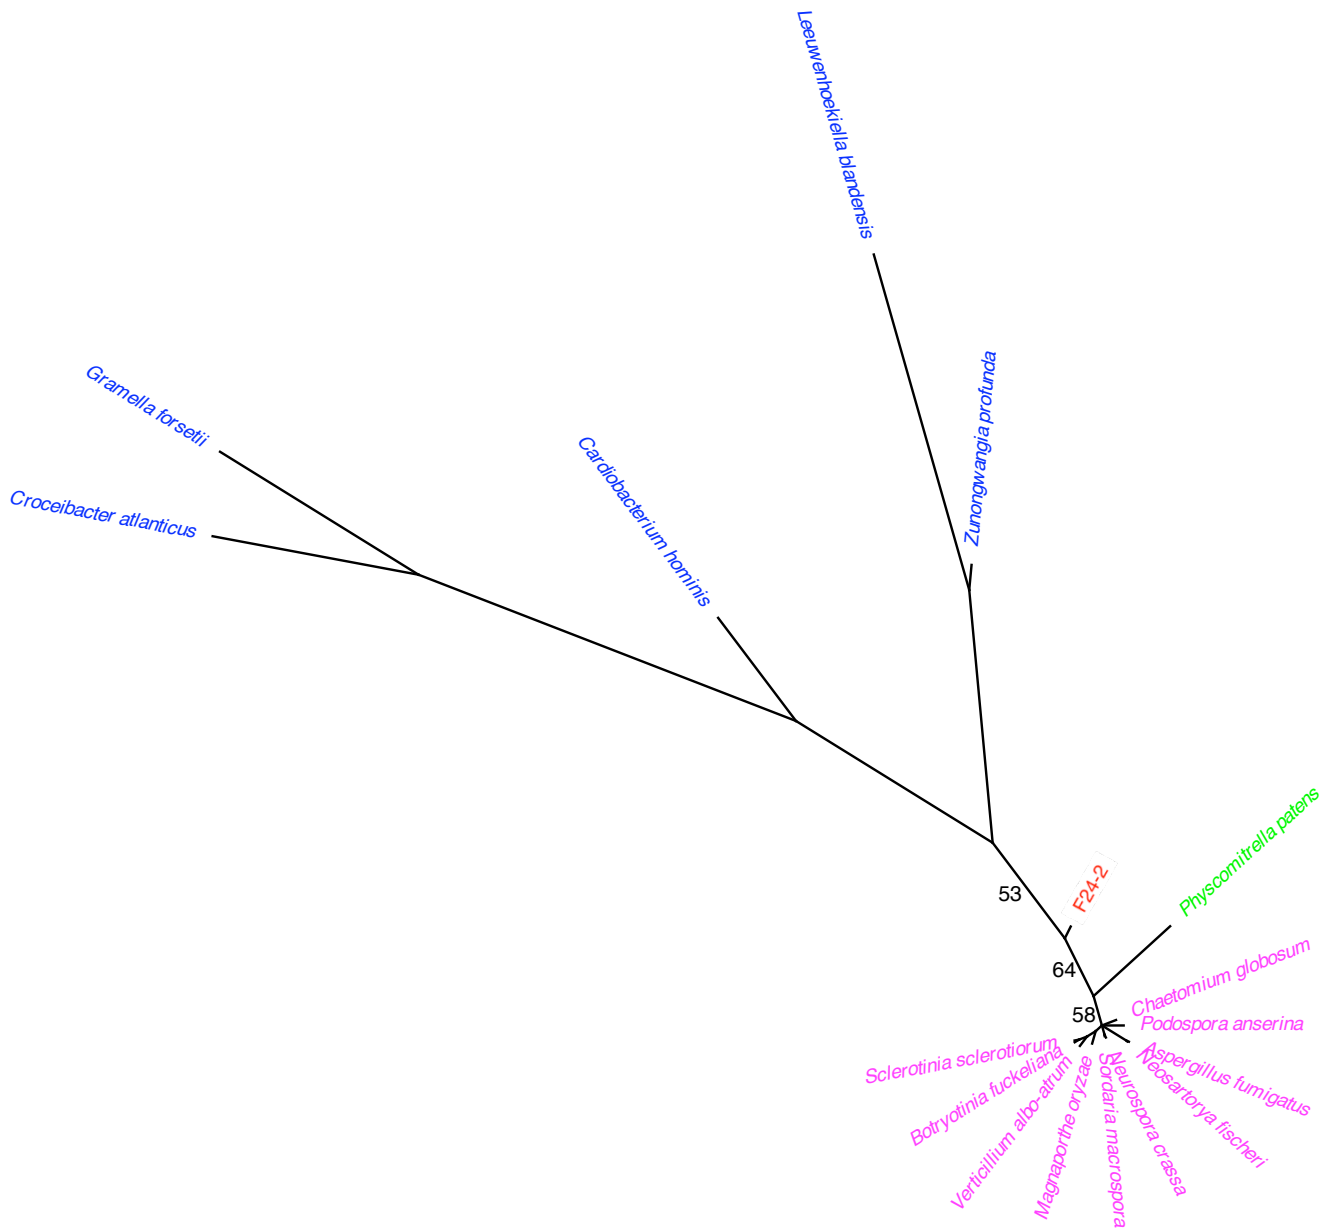

2.0

Fig. S2B

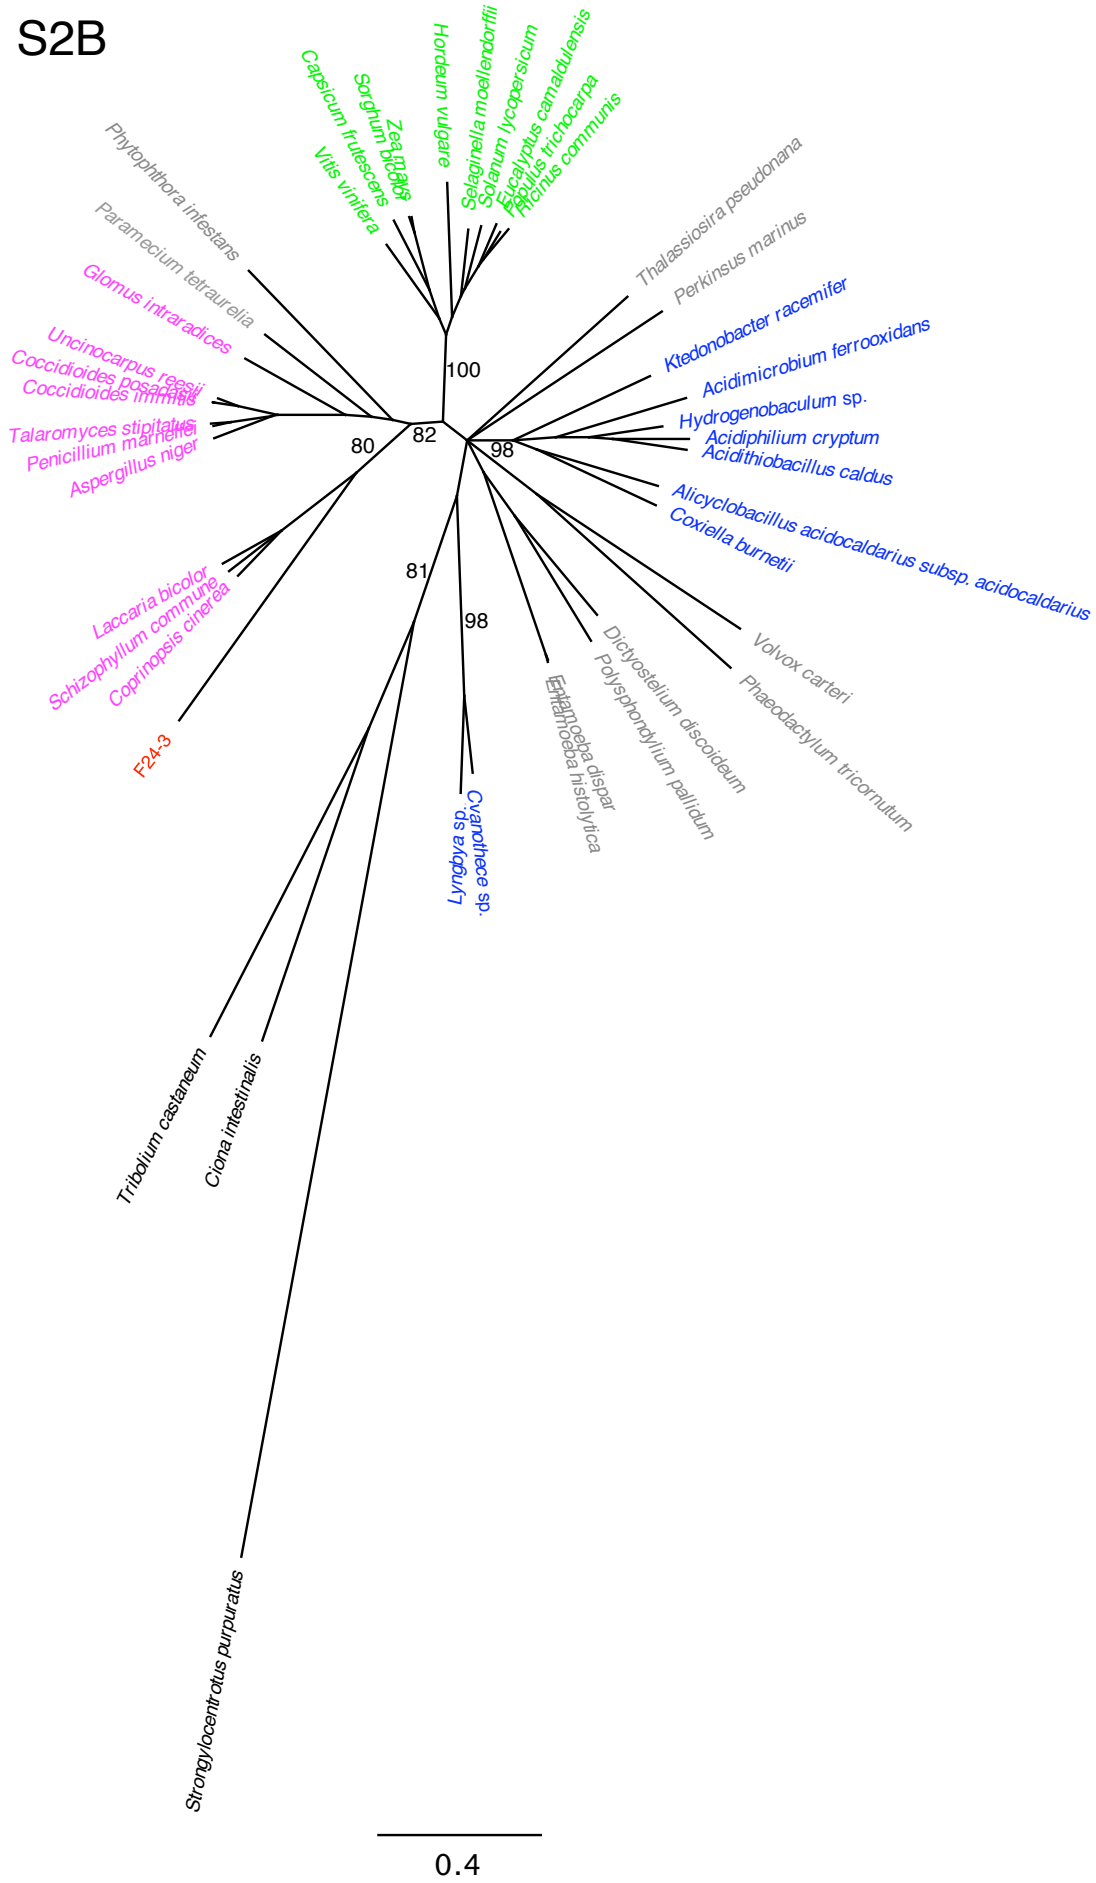

Fig. S2C

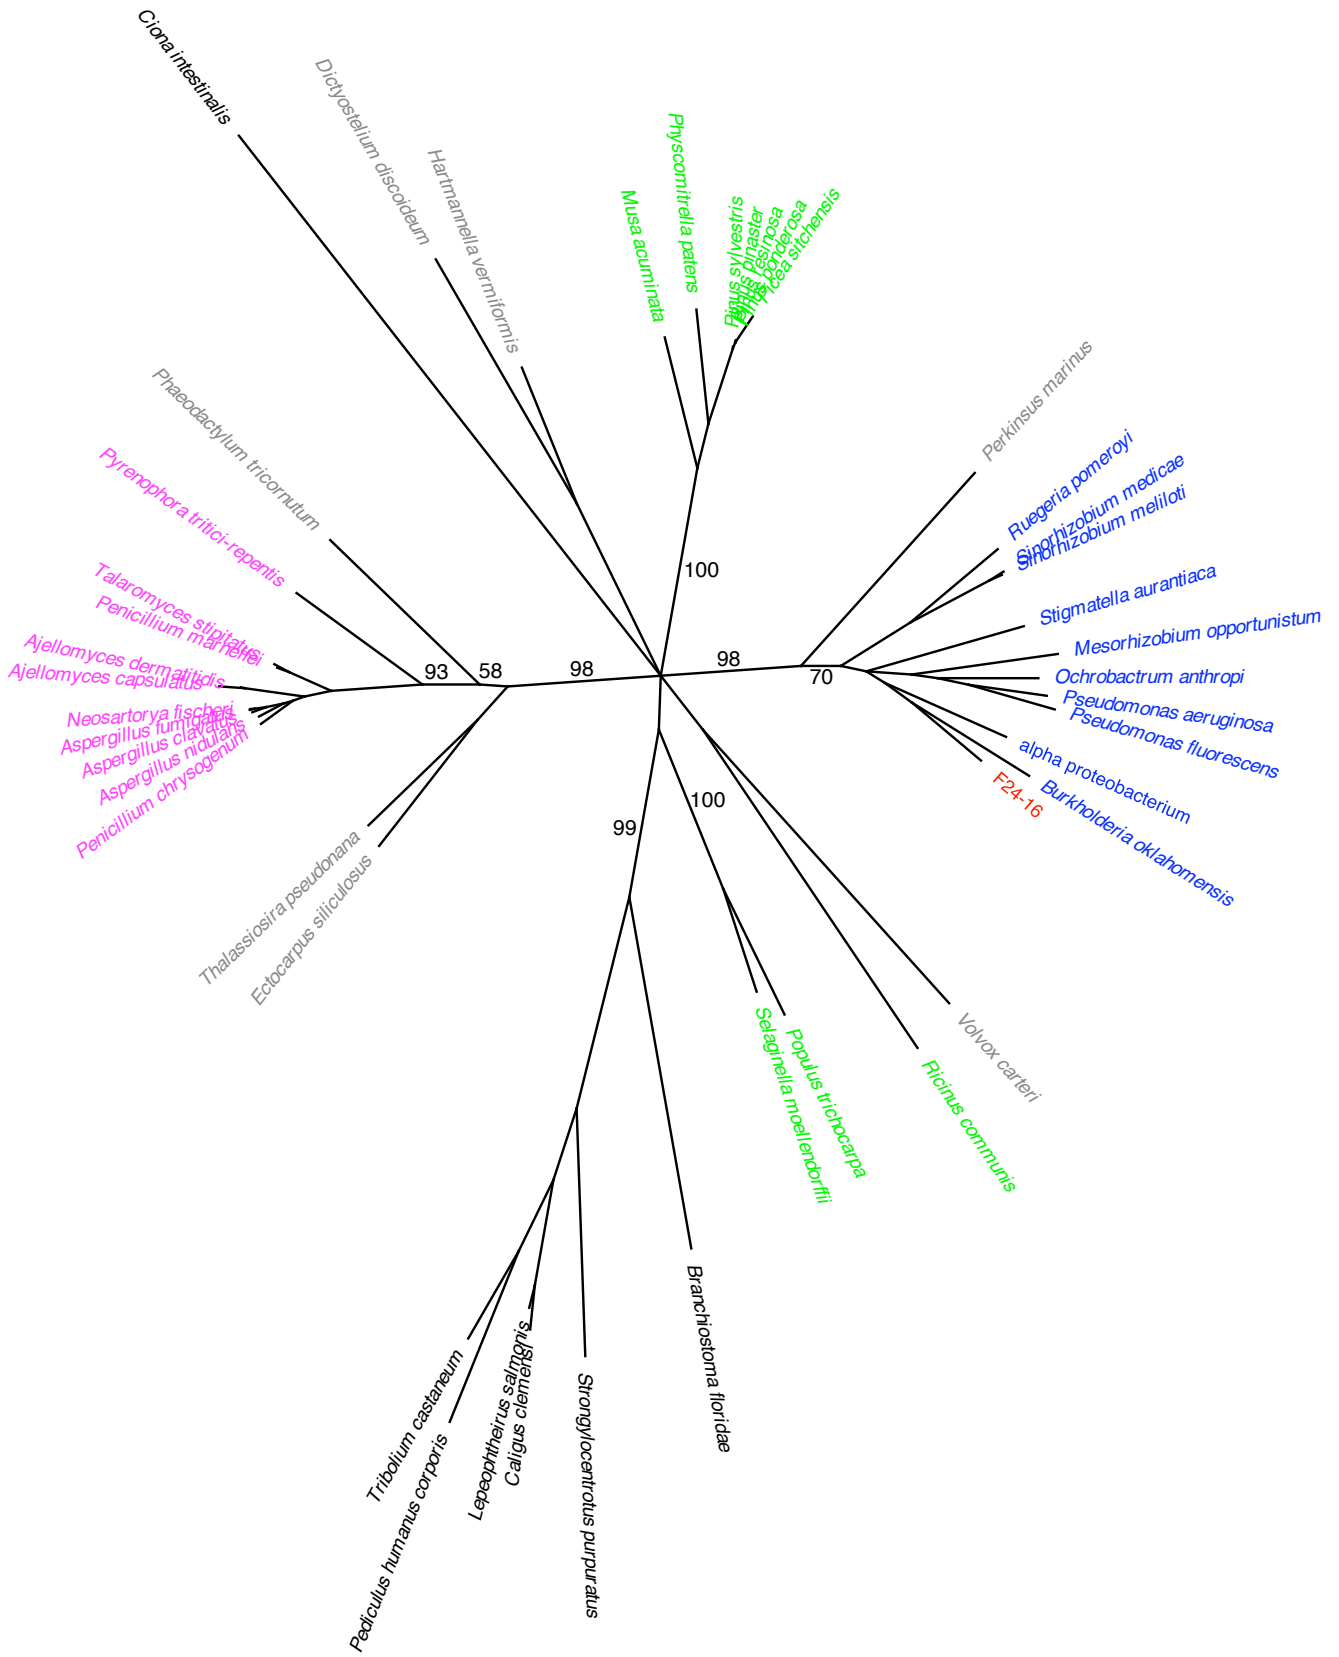

0.3

Supplement: jeb050328figs2-a-b-c.pdf [file jeb050328figs2-a-b-c.pdf]
